# Supplementary material for: Cold atmospheric helium plasma causes synergistic enhancement in cell death with hyperthermia and an additive enhancement with radiation
Source: PubMed Central journal article supplement (PMC5600975; doi:10.1038/s41598-017-11877-8), 2017-09-15
Supplement: 41598_2017_11877_MOESM1_ESM.pdf [file 41598_2017_11877_MOESM1_ESM.pdf]

## **Cold atmospheric helium plasma causes synergistic enhancement in cell death with hyperthermia and an additive enhancement with radiation**

Rohan Moniruzzaman<sup>1,+</sup>, Mati Ur Rehman<sup>2\*,+</sup>, Qing-Li Zhao<sup>2</sup>, Paras Jawaid<sup>2</sup>, Keigo Takeda<sup>3</sup>, Kenji Ishikawa<sup>3</sup>, Masaru Hori<sup>3</sup>, Kei Tomihara<sup>1</sup>, Kyo Noguchi<sup>2</sup>, Takashi Kondo<sup>2</sup>, Makoto Noguchi<sup>1</sup>

<sup>1</sup> Department of Oral and Maxillofacial Surgery, Graduate School of Medicine and Pharmaceutical Sciences, University of Toyama Sugitani 2630, Toyama, 930-0194, Japan.

<sup>2</sup> Department of Radiology, Graduate School of Medicine and Pharmaceutical Sciences, University of Toyama Sugitani 2630, Toyama, 930-0194, Japan.

<sup>3</sup> Institute of Innovation for Future Society, Nagoya University, Furo-cho, Chikusa-ku, Nagoya 4648603, Japan.

**Figure 1. supplementary online**

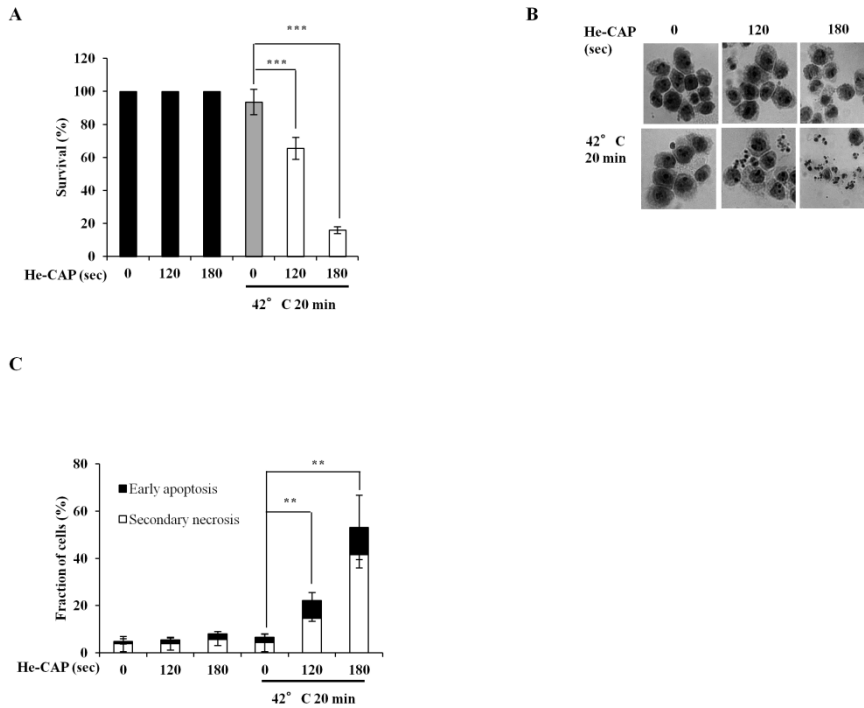

**Fig. S1. He-CAP and mild HT induced synergistic effects were detected at 24 h.** (A) Cell survival assay with cell counting kit-8 was carried out 24 h post-treatment after combined treatment with He-CAP and HT. Cell survival was significantly decreased with combined treatment of He-CAP 120 s and 180 s with mild HT. (B) The apoptotic features were further increased at 24 h as evident by Giemsa staining. (C) Evaluation of apoptosis at 24 h showed increased fraction of secondary apoptosis in the combined treatment. Data are shown as mean  $\pm$  SD (n=3), \*\*p<0.01, \*\*\*p<0.005, compared to HT treatment alone.

**Figure 2. supplementary online**

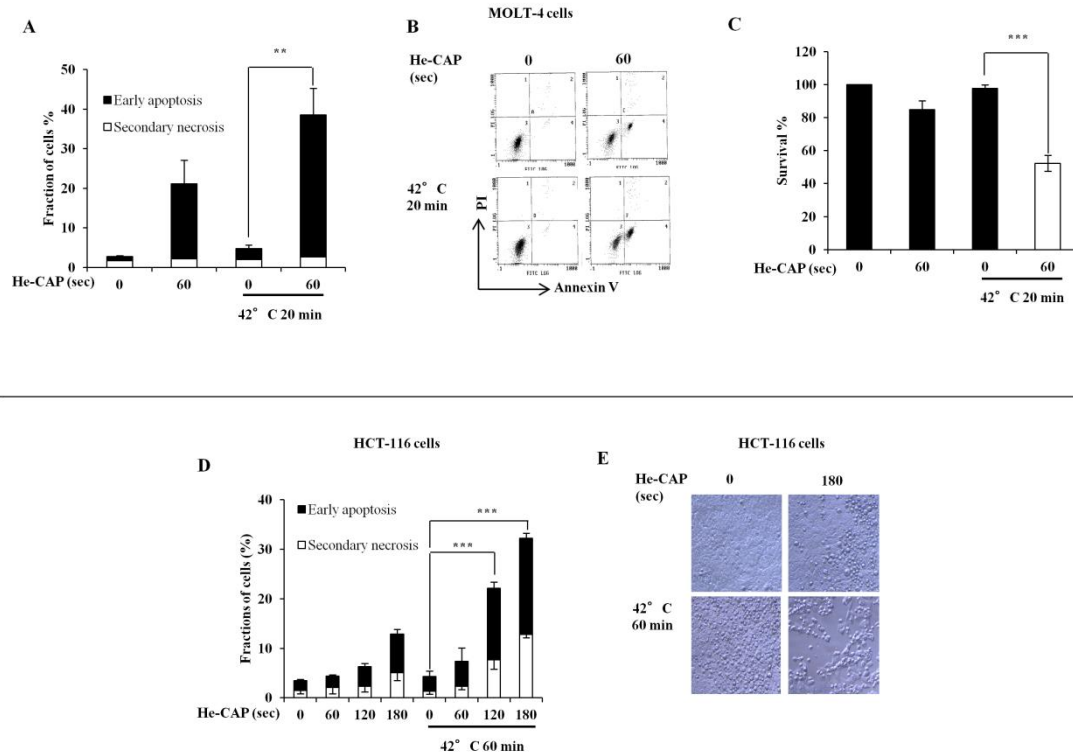

**Fig. S2. He-CAP and mild HT induced synergistic effects in other cancer cell lines.**

(A) Evaluation of apoptosis in MOLT-4 cells. (B) Representative flow cytometric histogram of Annexin V-FITC/PI staining in MOLT-4 cells. (C) Cell survival was assayed 6 h post-treatment following combined treatment by cell counting kit-8. Data are presented as the mean  $\pm$  SD (n=3). \*\*p<0.01, \*\*\*p<0.005, than HT alone. (D) Annexin V-FITC/PI assay was carried out at 24 h following combined treatment in HCT-116 cells. Dose dependent increased in the apoptosis was observed. Data are presented as the mean  $\pm$  SD (n=3). \*\*\*p<0.005, than HT alone (E) DIC live images of HCT-116 cells. Cell proliferation 24 h after combined treatment of He-CAP 180s and HT.

**Figure 3. supplementary online**

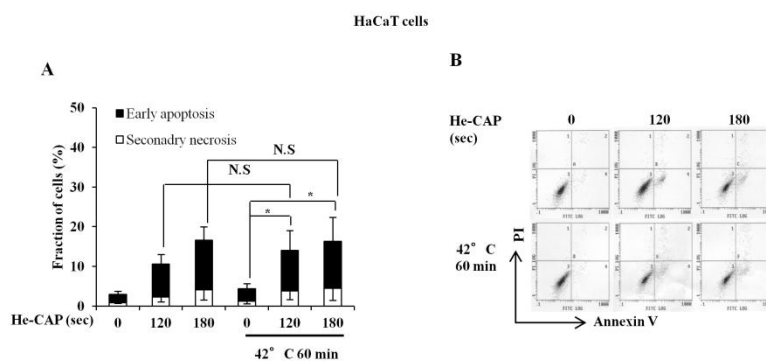

**Fig. S3. Effects of combined treatment in human keratinocyte (HaCaT) cell line.** (A) Annexin V-FITC/PI assay was carried out at 24 h following combined treatment in HaCaT cells. (B) Representative flow cytometric histogram of Annexin V-FITC/PI staining in HaCaT cells. No significant increased in the apoptosis was observed following combined treatment than He-CAP treatment alone. Data are presented as the mean  $\pm$  SD (n=4). \*p<0.05, than HT alone, N.S (not-significant).

**Figure 4. supplementary online**

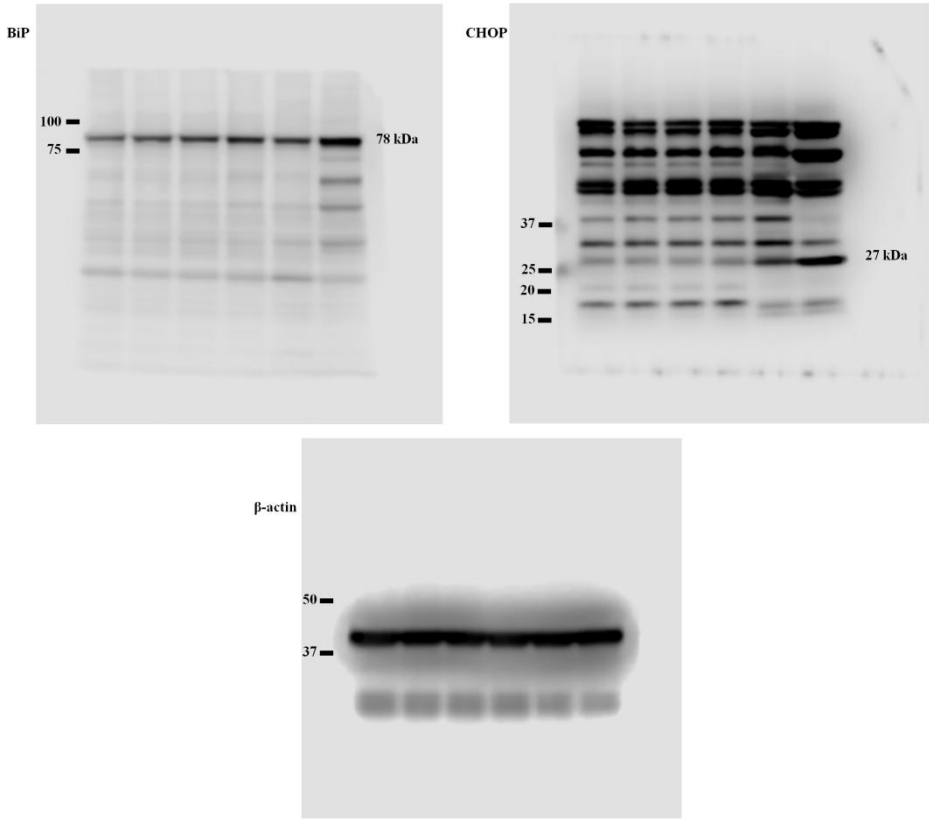

**Fig. S4.** Full-lengths blots of Figure 3.E.

Figure 5. supplementary online

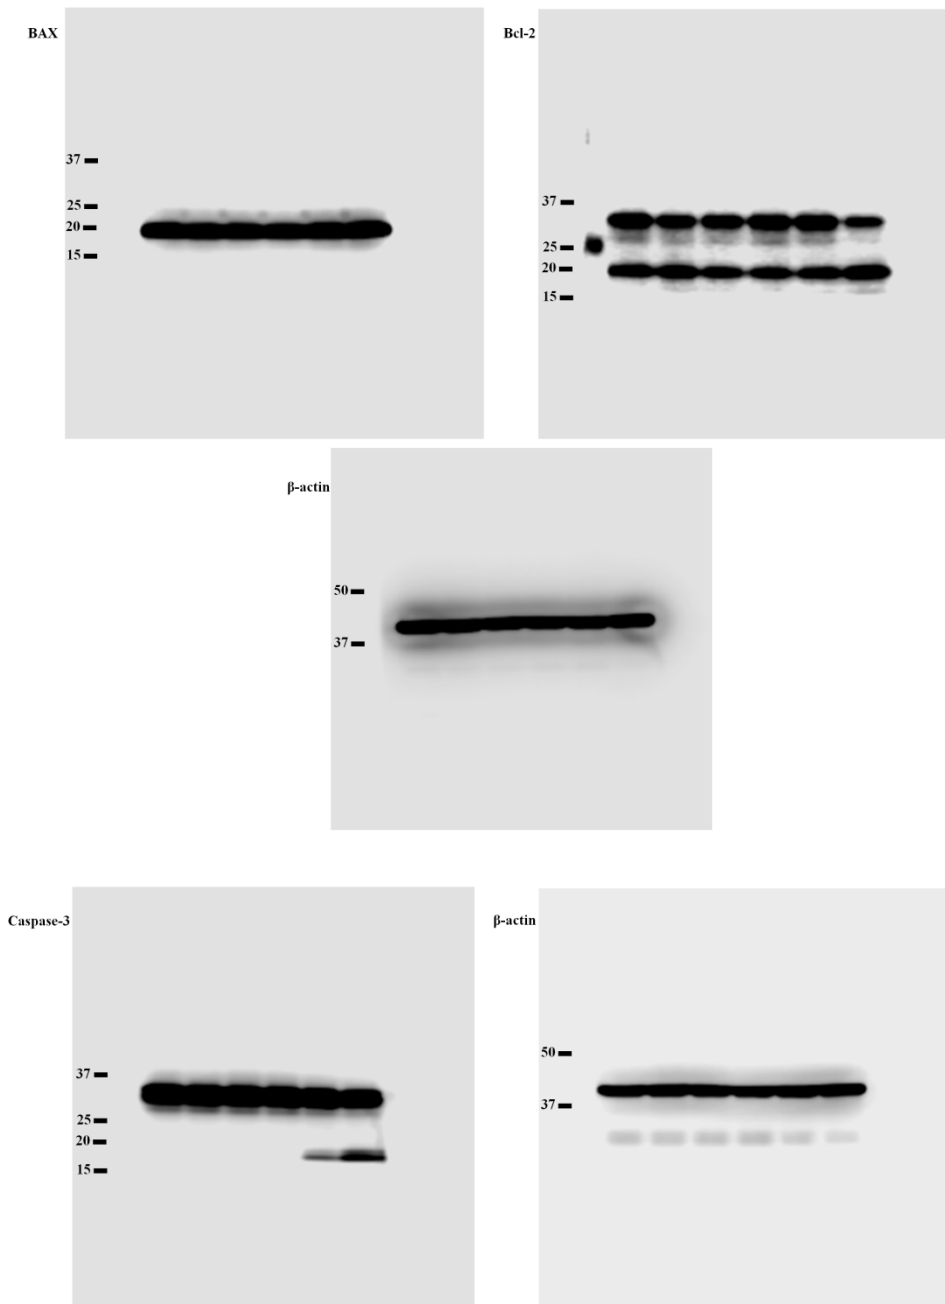

Fig. S5. Full-lengths blots of Figure 5.A.

**Figure 6. supplementary online**

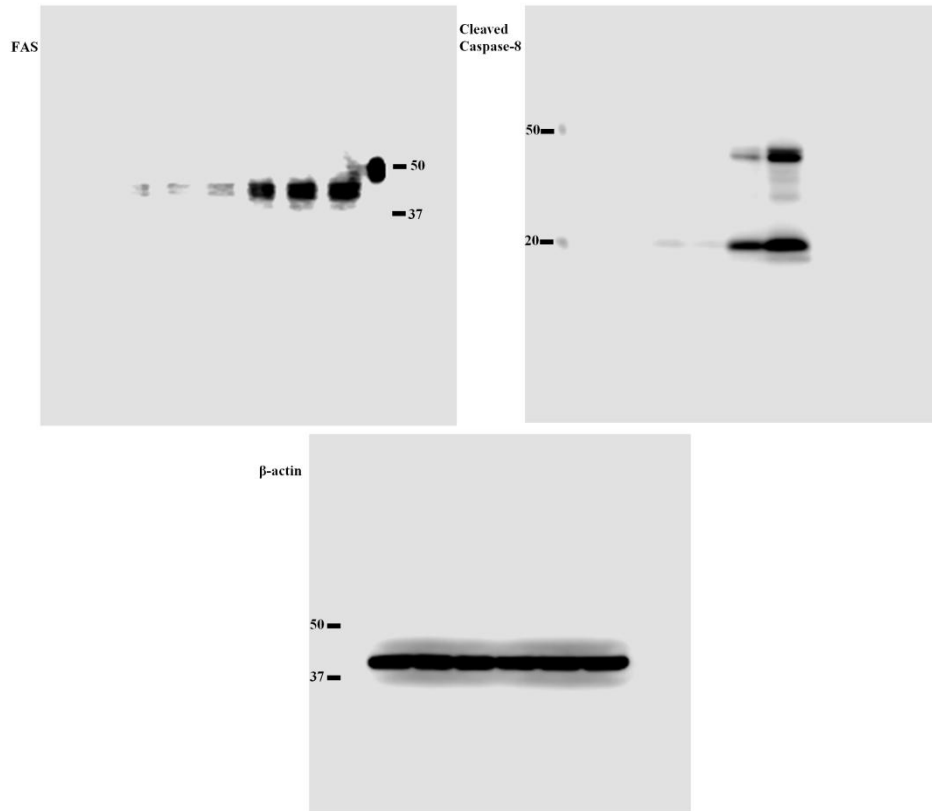

**Fig. S6.** Full-lengths blots of Figure 5.B.
